# Supplementary material
Source: Springer Nature journal article supplement (https://www.springermedizin.de/resource/supplementary/12891_2014_2176_MOESM1_ESM.pdf/9509622)

6MWT (Knee)

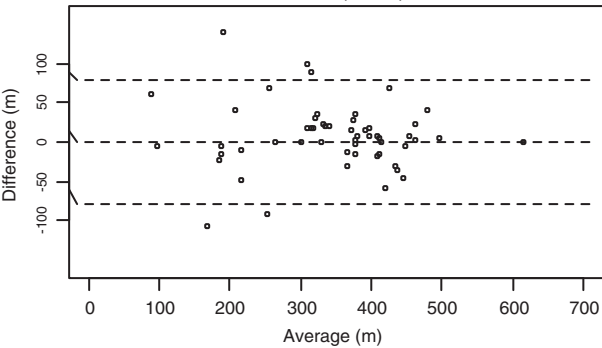

6MWT (Hip)

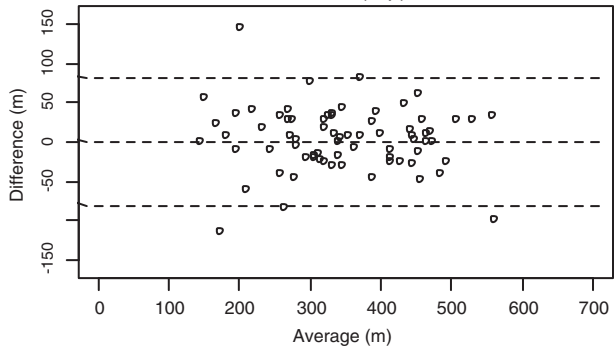

TUG (Knee)

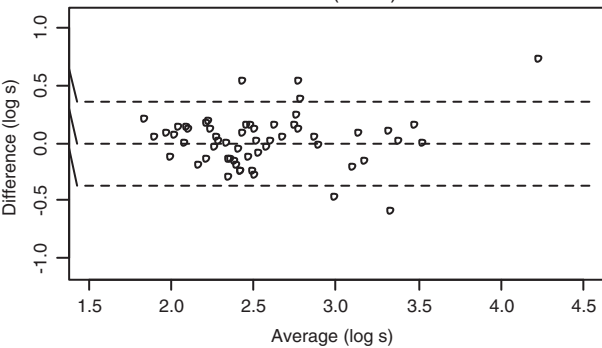

TUG (Hip)

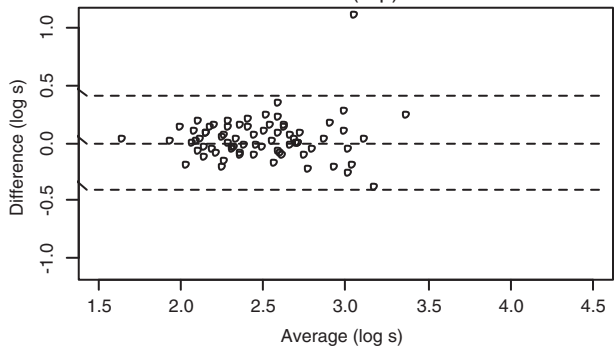

VAS (Knee)

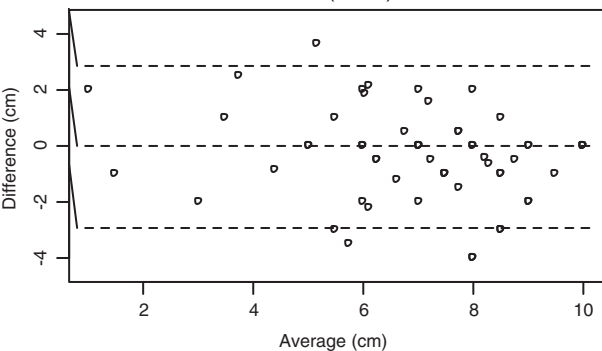

VAS (Hip)

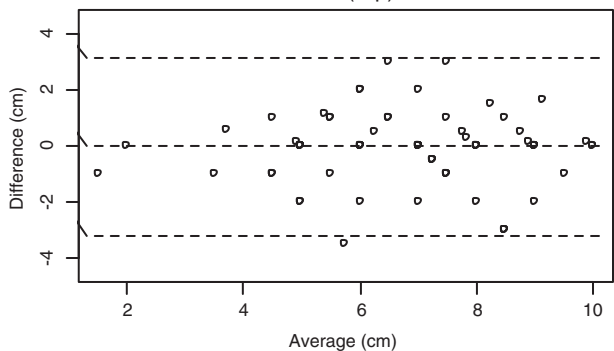

Supplement: MOESM1 [file 9509622]
